# Supplementary material for: Itaconate is a metabolic regulator of bone formation in homeostasis and arthritis
Source: PubMed Central journal article supplement (PMC11503170; doi:10.1136/ard-2023-224898), 2024-07-10

Figure S4

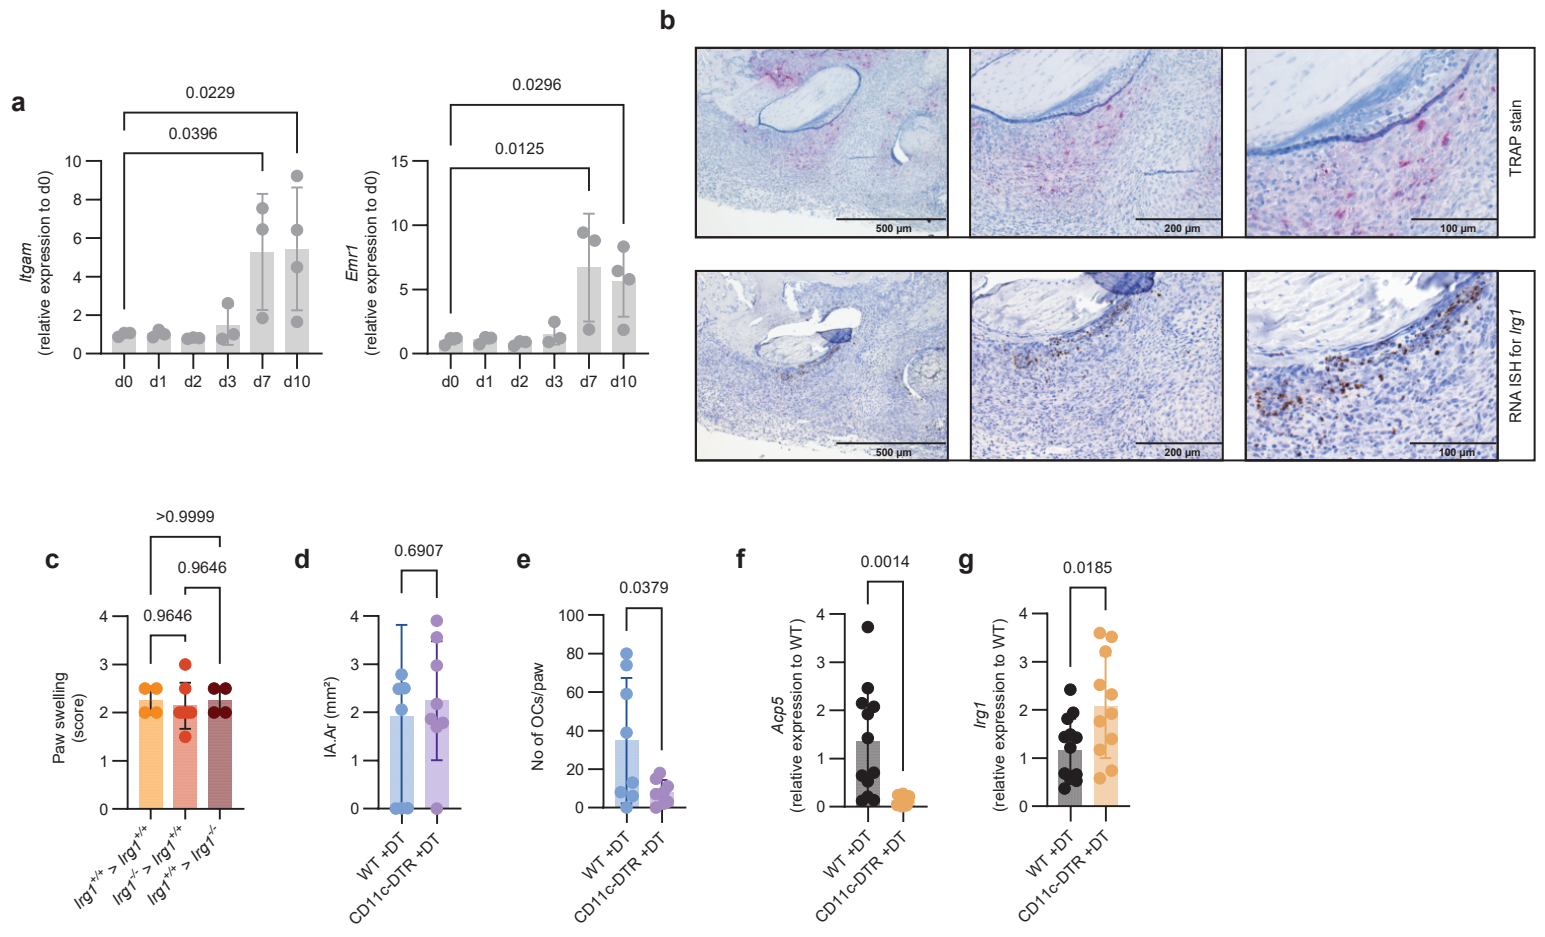

Supplement: ard-83-11-s004.pdf [file ard-83-11-s004.pdf]
